# Supplementary material for: Tuning the surface nanoroughness of the recombination junction for high-performance perovskite–silicon tandem solar cells
Source: Royal Society of Chemistry journal article supplement (doi:10.1039/d5el00164a), 2026-01-01
Supplement: d5el00164a1.pdf [file d5el00164a1.pdf]

## Supplementary Information

### **Tuning the surface nanoroughness of the recombination junction for high-performance perovskite-silicon tandem solar cells**

Yifeng Zhao<sup>1\*</sup>, Esma Ugur<sup>2,3\*</sup>, Arsalan Razzaq<sup>2</sup>, Thomas G. Allen<sup>2</sup>, Paul Procel<sup>1</sup>, Adi Prasetyo<sup>2</sup>, Imil F. Imran<sup>2</sup>, Cem Yilmaz<sup>3</sup>, Rik Hooijer<sup>3</sup>, Jian Huang<sup>3</sup>, Katarina Kovačević<sup>1</sup>, Yi Zheng<sup>1</sup>, Luana Mazzearella<sup>1</sup>, Erkan Aydin<sup>3</sup>, Stefaan De Wolf<sup>2</sup>, Olindo Isabella<sup>1</sup>

<sup>1</sup> Photovoltaic Materials and Devices, Delft University of Technology, 2628 CD, Delft, The Netherlands

<sup>2</sup> Center for Renewable Energy and Storage Technologies (CREST), Physical Sciences and Engineering Division (PSE), King Abdullah University of Science and Technology (KAUST), Thuwal 23955-6900, Saudi Arabia

<sup>3</sup> Department of Chemistry, Ludwig-Maximilians-Universität München (LMU), 81377, Munich, Germany

\* Both authors have contributed equally.

#### **Corresponding authors:**

Erkan Aydin ([erkan.aydin@cup.uni-muenchen.de](mailto:erkan.aydin@cup.uni-muenchen.de)), Stefaan De Wolf ([stefaan.dewolf@kaust.edu.sa](mailto:stefaan.dewolf@kaust.edu.sa)),

Olindo Isabella ([O.Isabella@tudelft.nl](mailto:O.Isabella@tudelft.nl))

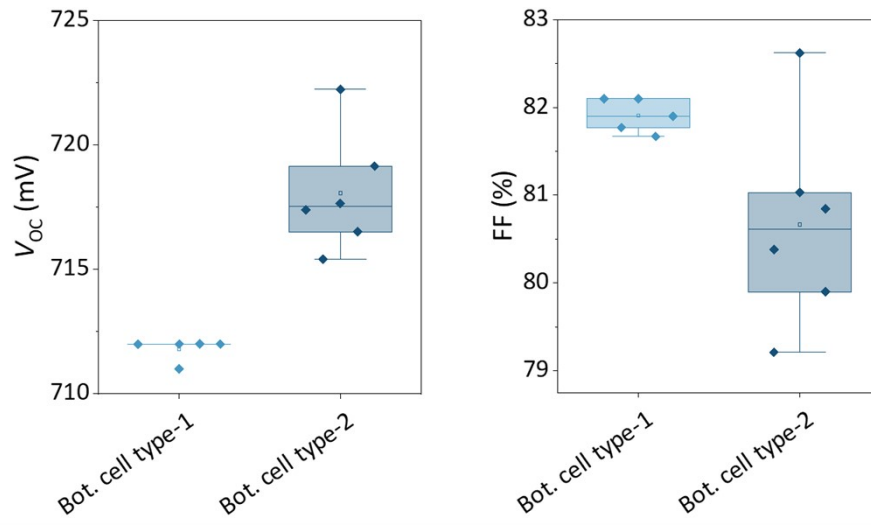

**Figure S1.** The  $V_{OC}$  and FF for the single-junction SHJ solar cells used in tandem solar cells shown in Figure 1. The spread of the parameters originates from process-related variability, mainly due to minor non-uniformities during thin-film depositions.

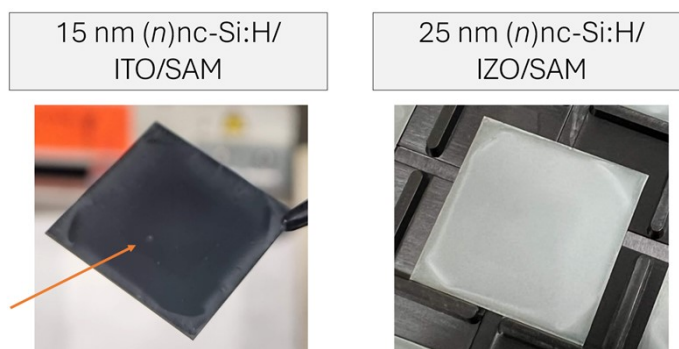

**Figure S2.** Photographs of perovskite thin films deposited on silicon bottom cells based on 15-nm-thick and 25-nm-thick (*n*)nc-Si:H layers. There are pinhole formation and film defects on the sample based on 15-nm-thick (*n*)nc-Si:H layer.

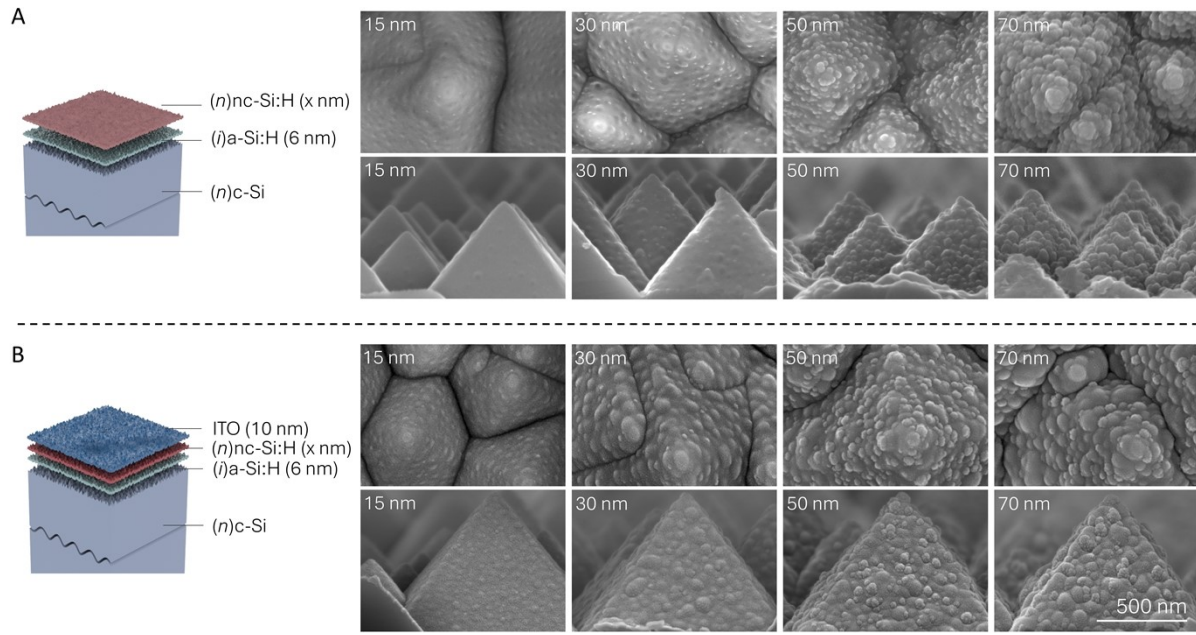

**Figure S3.** The schematics and SEM micrographs (with top and bottom rows displaying top views and cross-sectional views, respectively) of (i)a-Si:H-coated (6-nm-thick) textured c-Si samples with varied thicknesses of (n)nc-Si:H layers **A** without and **B** with 10 nm ITO layers. The thicknesses indicated in the figures are estimated based on the measured deposition rate on co-deposited flat samples. The addition of a 10-nm-thick ITO layer on top of the (n)nc-Si:H layers resulted in a more apparent surface nanoroughness across all samples. The thin ITO layer resulted in densely packed, fine-grained nanostructures presumably related to its crystalline structure.<sup>1,2</sup>

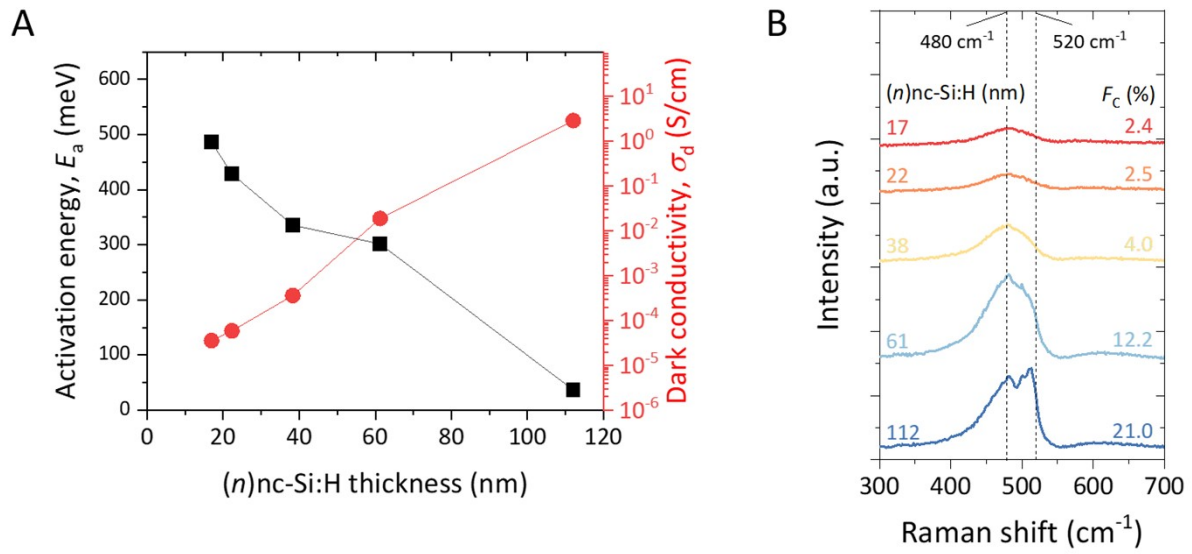

**Figure S4.** **A** The activation energy ( $E_a$ ), dark conductivity ( $\sigma_d$ ) and **B** Raman spectra and crystalline fraction ( $F_C$ ) of (n)nc-Si:H layers with varied thicknesses deposited on (i)a-Si:H-coated (10-nm-thick) glass substrates. Note, as the green laser ( $\lambda_{\text{laser}} = 514$  nm) has a penetration depth of a few hundred nanometers in the studied (n)nc-Si:H layers, their crystalline fraction is underestimated due to non-negligible signals from the 10-nm-thick (i)a-Si:H layer underneath.

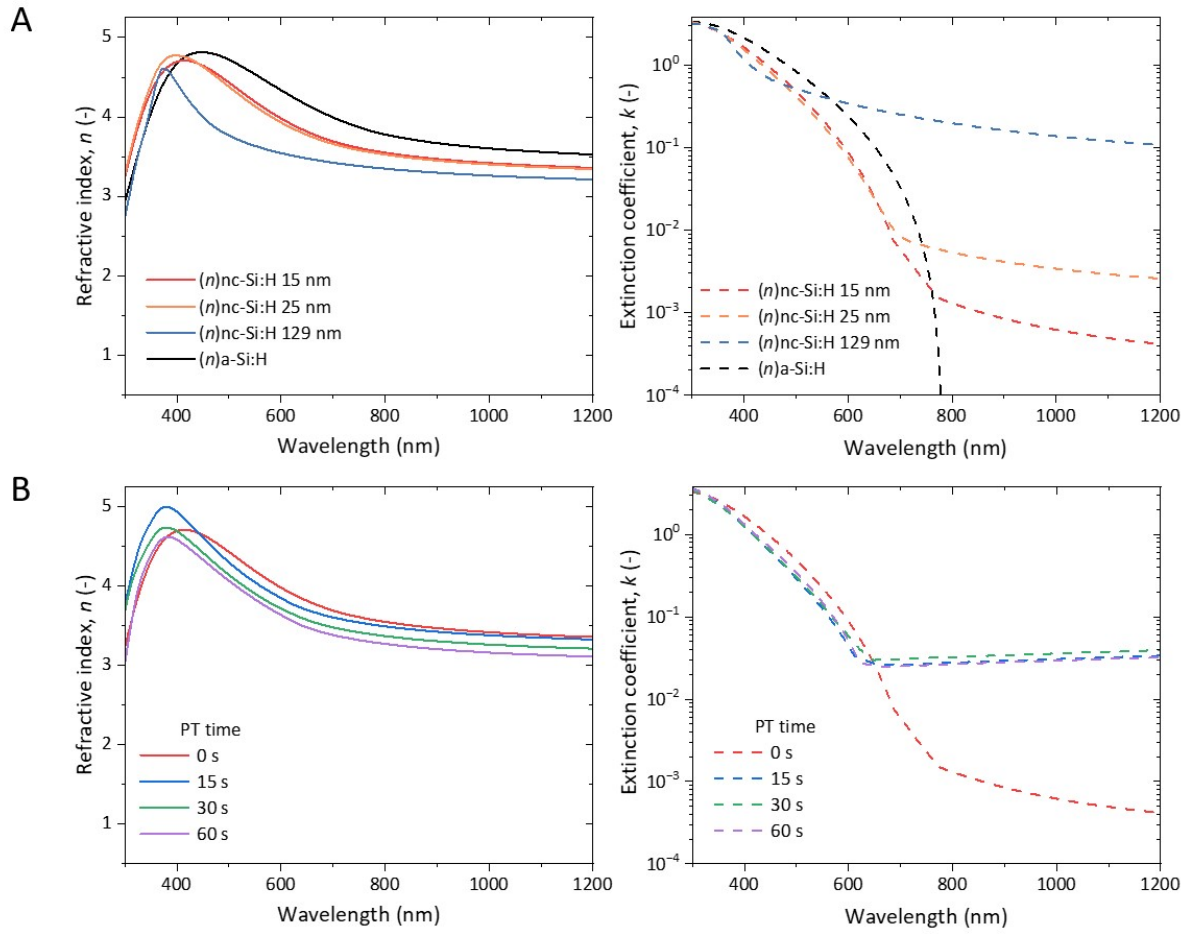

**Figure S5.** The optical constants of  $(n)nc-Si:H$  layers with **A** varied thicknesses and **B** 15-nm-thick layers with different PT durations. In **A**, the optical constants of 6-nm-thick  $(n)a-Si:H$  are added for comparisons. All samples feature 10-nm-thick  $(i)a-Si:H$  layers underneath the  $(n)nc-Si:H$  layers to extract device-relevant layer properties. The  $(n)nc-Si:H$  layers show lower absorption at shorter wavelengths and higher absorption at longer wavelengths compared with the  $(n)a-Si:H$  layer. This behavior arises from the coexistence of amorphous and nanocrystalline phases in  $(n)nc-Si:H$  layers, which shifts absorption toward longer wavelengths and is further influenced by increased crystallinity and doping, achieved through increased film thickness or by applying the plasma treatment before their depositions.<sup>3–7</sup> Overall, more crystallized nc-Si:H layers exhibit reduced short-wavelength absorption and enhanced long-wavelength absorption.

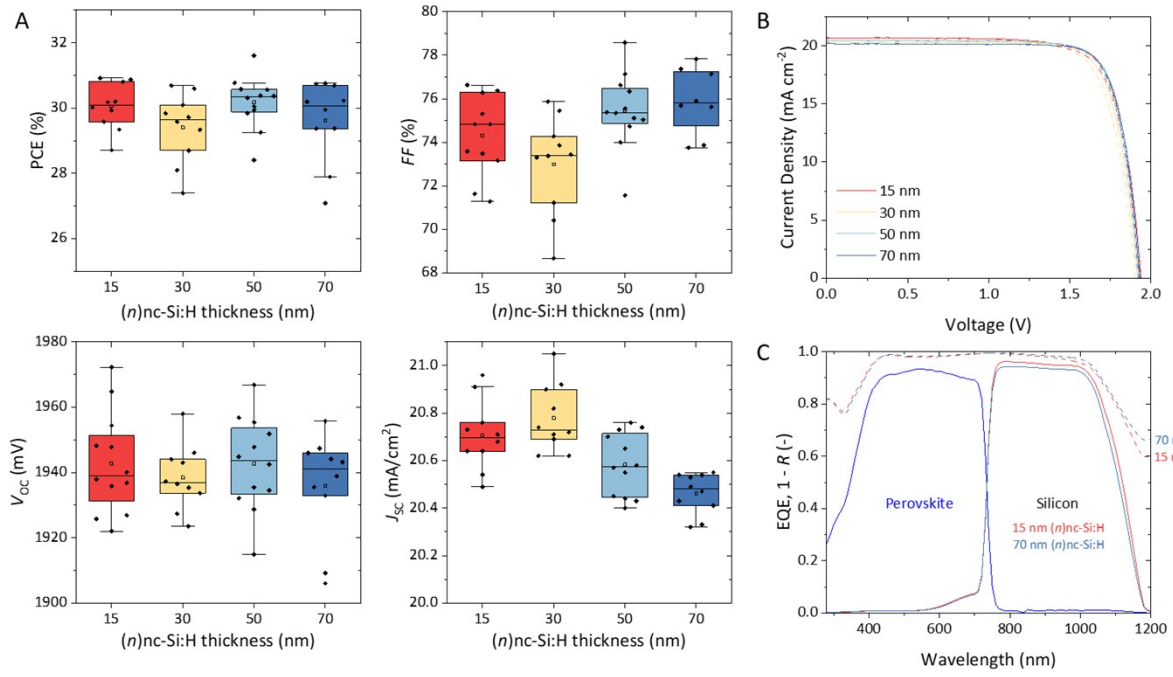

**Figure S6.** **A** The  $J-V$  parameters of tandem solar cells featuring  $(n)\text{nc-Si:H}$  with varied thicknesses, **B** the  $J-V$  characteristic of the best devices for each  $(n)$ -layer, and **C** the EQE and  $1 - R$  (reflectance) spectra of tandem solar cells featuring 15-nm-thick and 70-nm-thick  $(n)\text{nc-Si:H}$  layers.

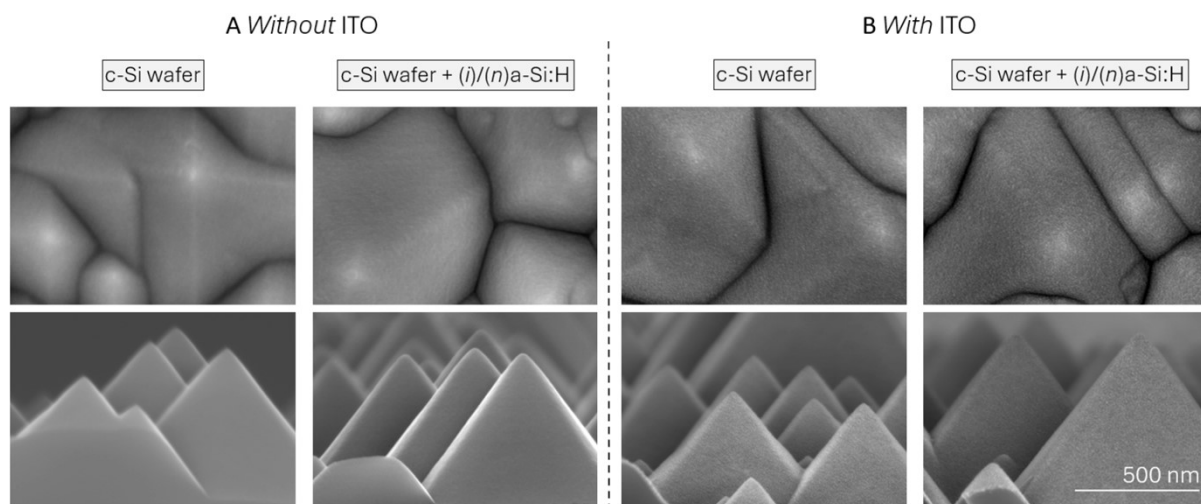

**Figure S7.** The SEM micrographs of textured c-Si wafers and c-Si samples with (i)/(n)a-Si:H (6 nm/6 nm) layer stack **A** without and **B** with 10-nm-thick ITO. The top and bottom rows display the top and cross-sectional views, respectively.



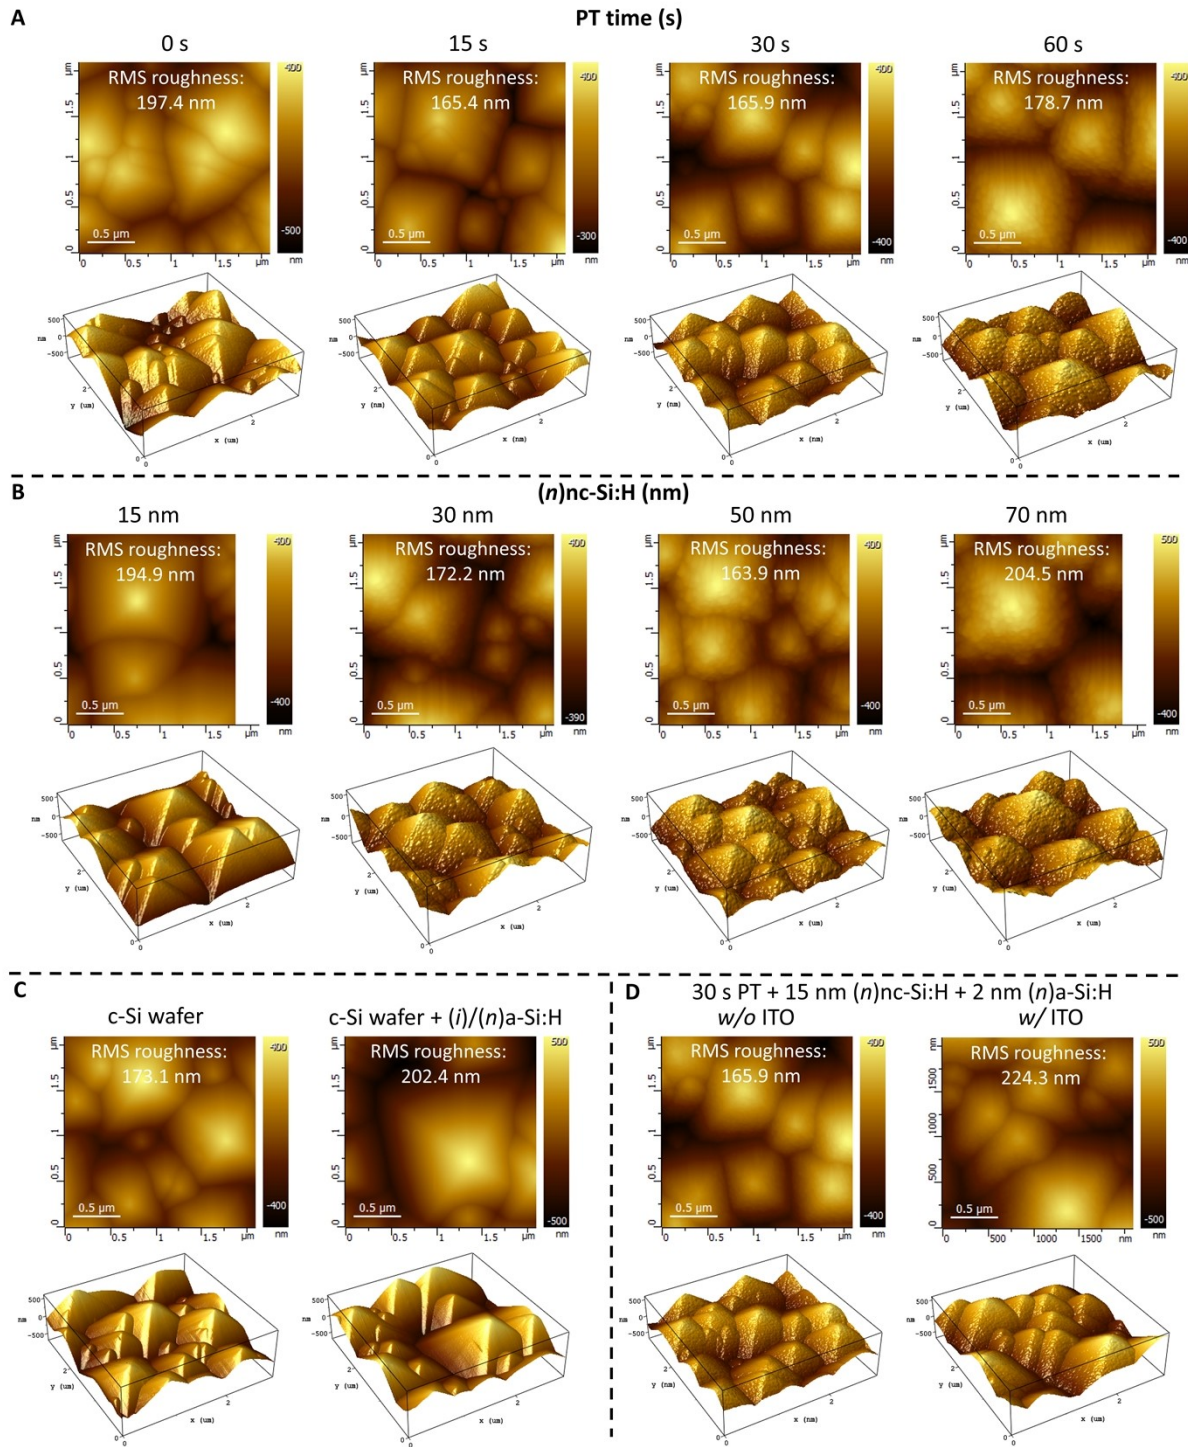

**Figure S8.** The AFM images (top and bottom rows displaying 2D and 3D images, respectively) of textured c-Si samples with different layer stacks: **A** 15-nm-thick (n)nc-Si:H + 2-nm-thick (n)a-Si:H layers with different durations of plasma treatment (PT) applied prior to the deposition of (n)nc-Si:H layers; **B** varied thicknesses of (n)nc-Si:H layers without plasma treatment applied before their depositions; **C** bare c-Si wafer and c-Si wafer with (i)/(n)a-Si:H layers and **D** 15-nm-thick (n)nc-Si:H + 2-nm-thick (n)a-Si:H layers, with 30-second-long PT applied before deposition of the (n)nc-Si:H layers, without

and with a 10-nm-thick ITO layer. Note all samples in figures A, B and D feature 6-nm-thick (*i*)a-Si:H layers underneath the (*n*)-layers (stacks). It is worth noting that roughness quantification and accurate nanoscale information were limited by the dominant pyramidal texture of c-Si wafers, cantilever-facet angle mismatches, and measurement artefacts that prevented reliable capture of fine surface features. Although flat substrates would allow more accurate AFM quantification, they would not fully reflect real device-relevant surfaces. Future work will explore the use of high-aspect-ratio cantilevers, together with leveraging the pyramid facets as reference planes, to enable reliable RMS nanoroughness quantification of layers (stacks) deposited on textured c-Si wafers.

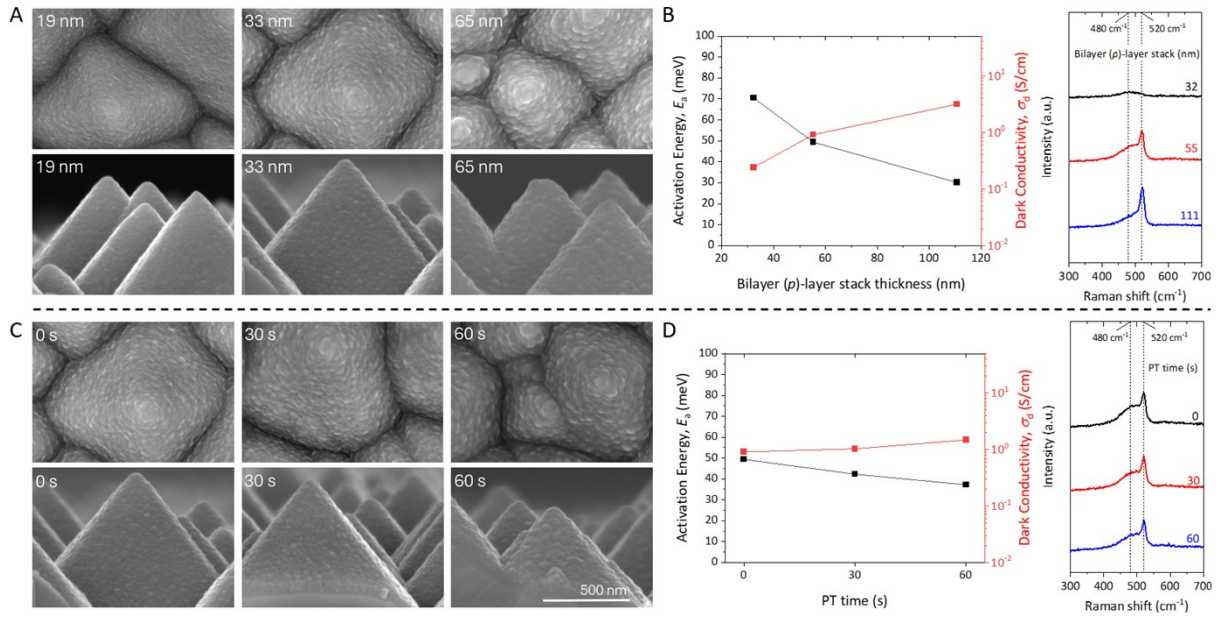

**Figure S9.** The SEM micrographs of (i)a-Si:H-coated (6-nm-thick) textured c-Si samples with A varied thicknesses of bilayer (*p*)-layer stacks (5-nm-thick (*p*)nc-SiO<sub>x</sub>:H layers together with changing thicknesses of (*p*)nc-Si:H layers) without plasma treatment and C different durations of plasma treatment on ~33 nm (*p*)-layer stacks. The top and bottom rows display top views and cross-sectional views, respectively. B, D The measured activation energy ( $E_a$ ), dark conductivity ( $\sigma_d$ ) and Raman spectra of (*p*)-layer stack with varied conditions are also presented. The (*p*)-layer stack thickness for the PT series to extract  $E_a$  and  $\sigma_d$  is around 55 nm. The deposition conditions and material properties of the bilayer (*p*)-layer stacks are reported in a previous publication.<sup>8</sup>

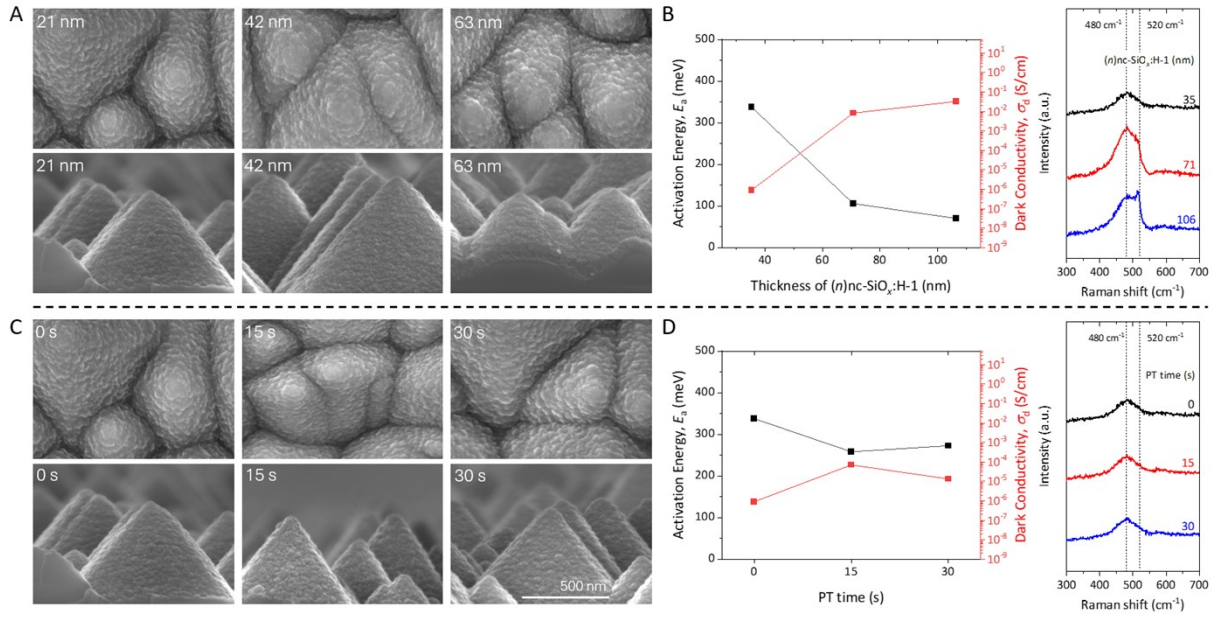

**Figure S10.** The SEM micrographs of (i)a-Si:H-coated (6-nm-thick) textured c-Si samples with **A** varied thicknesses of (n)nc-SiO<sub>x</sub>:H-1 layers without plasma treatment and **C** different durations of plasma treatment on ~21-nm-thick (n)nc-SiO<sub>x</sub>:H-1 layers. The top and bottom rows display top views and cross-sectional views, respectively. **B**, **D** The measured activation energy ( $E_a$ ), dark conductivity ( $\sigma_d$ ) and Raman spectra of (n)nc-SiO<sub>x</sub>:H-1 layers with varied conditions are also presented. The (n)nc-SiO<sub>x</sub>:H-1 layer thickness for the PT series to extract  $E_a$  and  $\sigma_d$  is around 35 nm. The deposition conditions and material properties of the (n)nc-SiO<sub>x</sub>:H-1 are reported in a previous publication.<sup>9</sup>

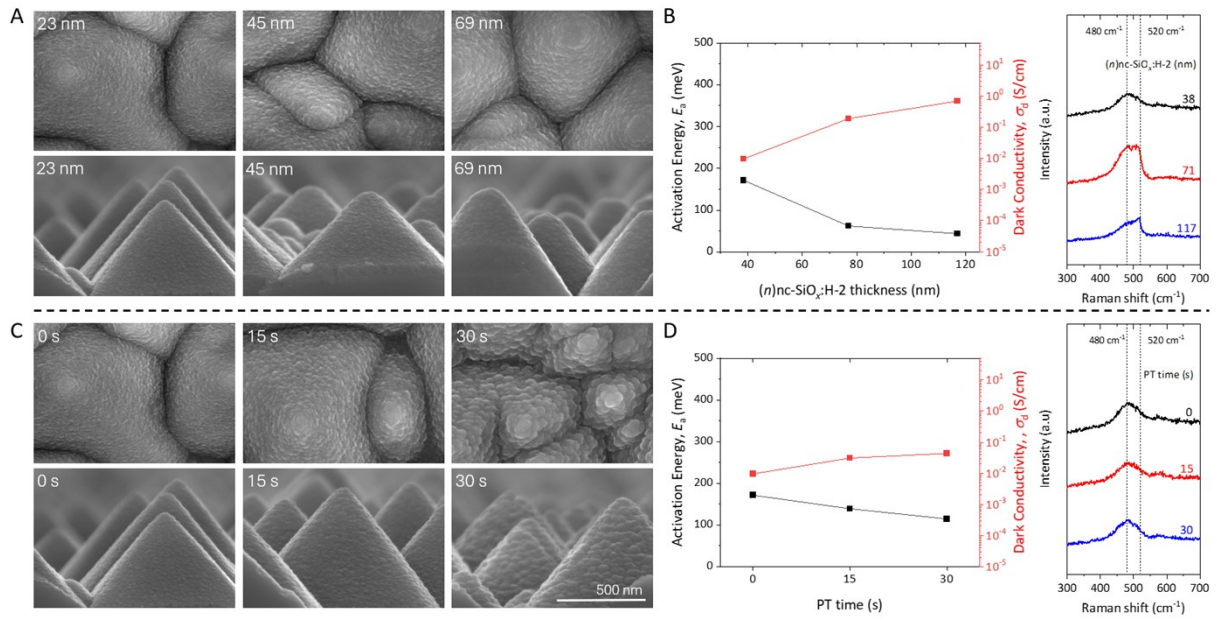

**Figure S11.** The SEM micrographs of (i)a-Si:H-coated (6-nm-thick) textured c-Si samples with **A** varied thicknesses of (n)nc-SiO<sub>x</sub>:H-2 layers without plasma treatment and **C** different durations of PT on ~23-nm-thick (n)nc-SiO<sub>x</sub>:H-2 layers. The top and bottom rows display top views and cross-sectional views, respectively. **B, D** The measured activation energy ( $E_a$ ), dark conductivity ( $\sigma_d$ ) and Raman spectra of (n)nc-SiO<sub>x</sub>:H-2 layers with varied conditions are also presented. The (n)nc-SiO<sub>x</sub>:H-2 layer thickness for the PT series to extract  $E_a$  and  $\sigma_d$  is around 38 nm. The deposition conditions and material properties of the (n)nc-SiO<sub>x</sub>:H-2 are reported in a previous publication.<sup>9</sup>



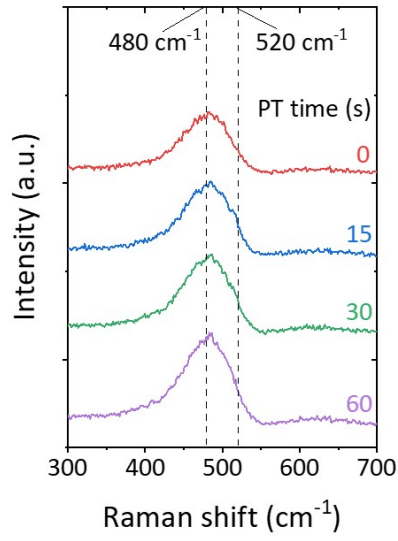

**Figure S12.** Raman spectra of 15-nm-thick (*n*)nc-Si:H layers with varied durations of the plasma treatment. As the green laser ( $\lambda_{\text{laser}} = 514 \text{ nm}$ ) was used, the spectra are dominated by the underlying (*i*)a-Si:H layers, showing insignificant differences with different durations of plasma treatment.

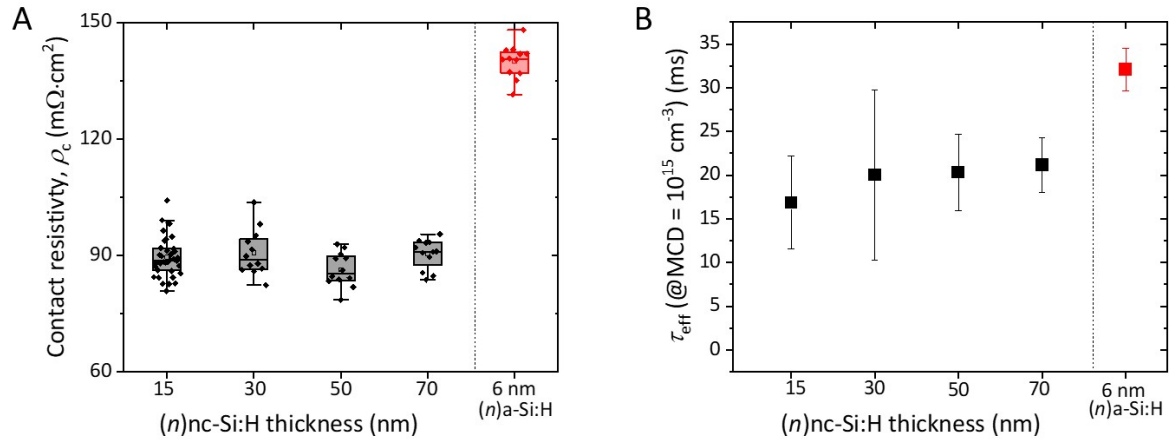

**Figure S13. A** The contact resistivity ( $\rho_c$ ) and **B** the effective minority carrier lifetime ( $\tau_{\text{eff}}$ ) of symmetric *n-n* device stacks as sketched in Figure 2(D) without the plasma treatment. In both figures, the  $\rho_c$  and  $\tau_{\text{eff}}$  of samples with 6-nm-thick (n)a-Si:H are added for comparison.

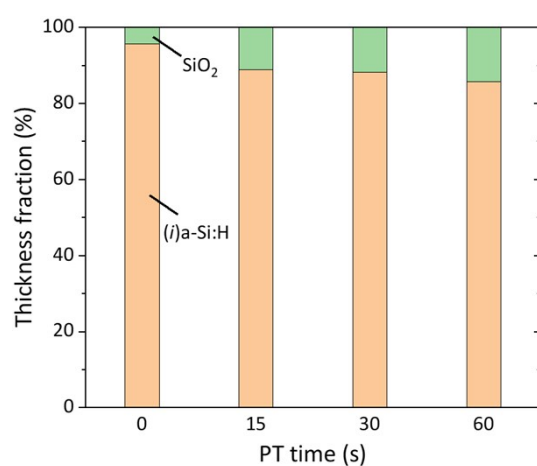

**Figure S14.** The thickness fractions of (i)a-Si:H and SiO<sub>2</sub> in around 13-nm-thick (i)a-Si:H layers upon varying plasma treatment (PT) durations. The thickness of each layer was determined via spectroscopic ellipsometry measurements.



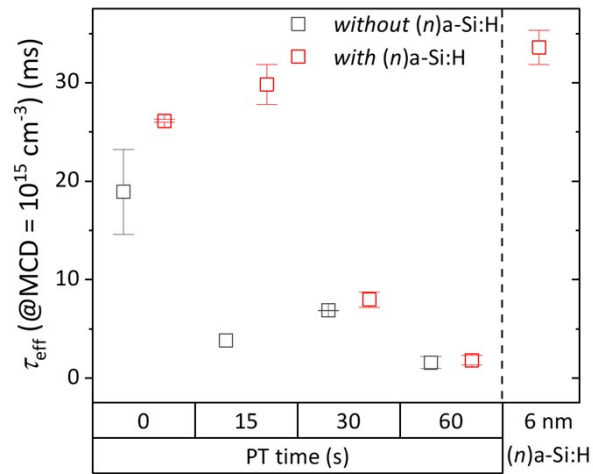

**Figure S15.** The effective minority carrier lifetime ( $\tau_{\text{eff}}$ ) values of symmetrical  $n$ - $n$  samples featuring 15-nm-thick ( $n$ )nc-Si:H layers, without or with a 2-nm-thick ( $n$ )a-Si:H capping layer, as a function of plasma treatment duration, before ITO sputtering.

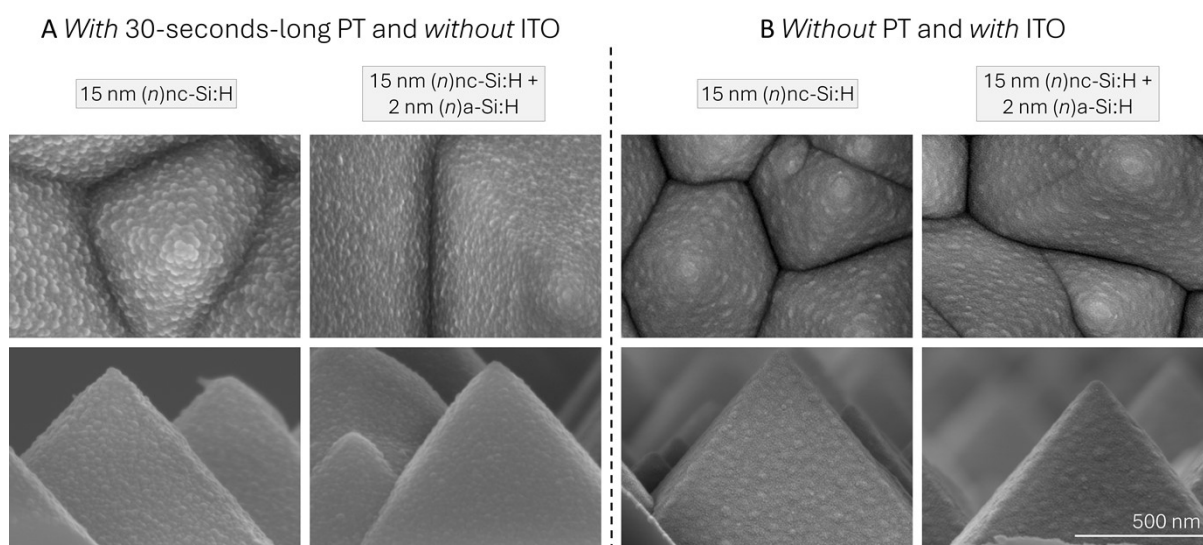

**Figure S16.** The SEM micrographs of (i)a-Si:H-coated (6-nm-thick) textured c-Si samples featuring 15-nm-thick (n)nc-Si:H layer and 15-nm-thick (n)nc-Si:H + 2-nm-thick (n)a-Si:H layer stack **A** with a 30-second-long plasma treatment (PT) prior to (n)nc-Si:H deposition and without ITO, and **B** without PT and with 10-nm-thick ITO layers. The top and bottom rows display the top and cross-sectional views, respectively.

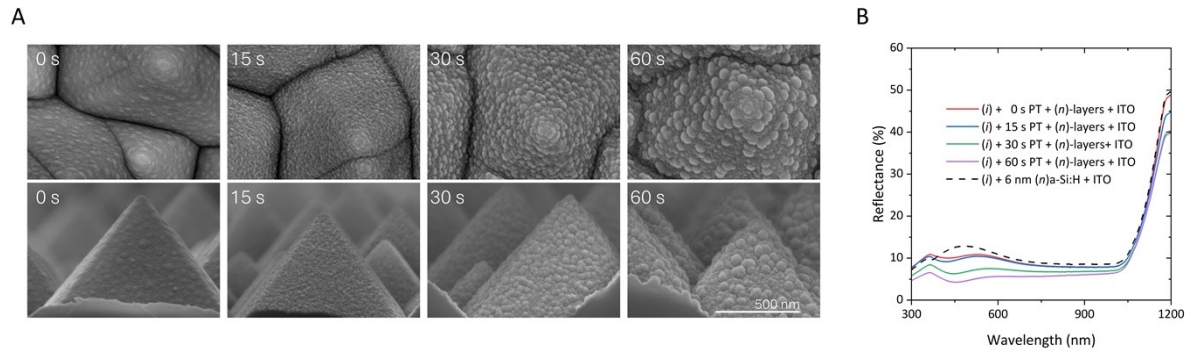

**Figure S17.** **A** The SEM micrographs (with top and bottom rows displaying top views and cross-sectional views, respectively) and **B** the reflectance spectra of (i)a-Si:H-coated (6-nm-thick) textured c-Si samples with 15-nm-thick (n)nc-Si:H + 2-nm-thick (n)a-Si:H layers ((n)-layers) and 10-nm-thick ITO layers with varied durations of PT.

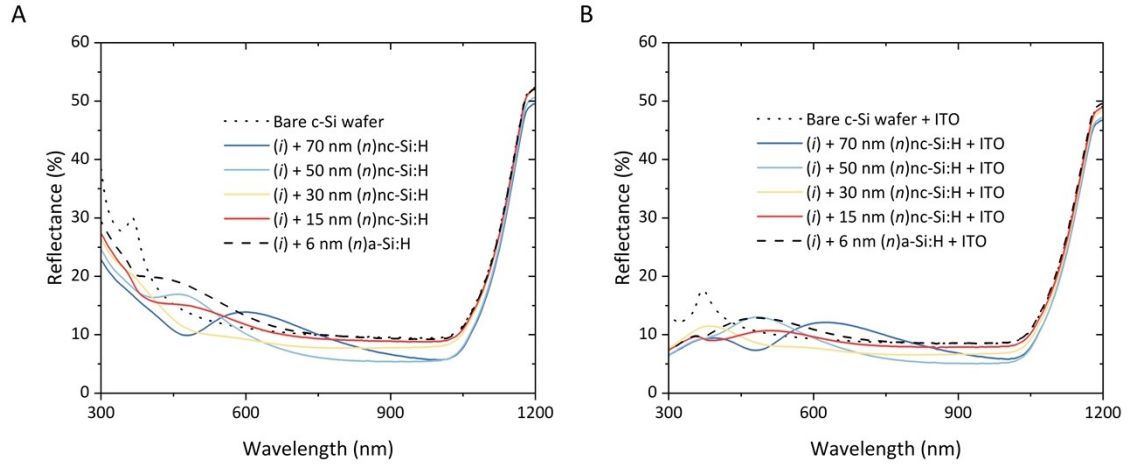

**Figure S18.** The reflectance spectra of samples featuring varied thicknesses of (n)nc-Si:H layers **A** without and **B** with 10-nm-thick ITO layers, on (i)a-Si:H-coated (6-nm-thick) textured c-Si substrates. The reflectance spectra of the bare textured c-Si wafer and the sample with 6-nm-thick (n)a-Si:H layer are plotted as references.

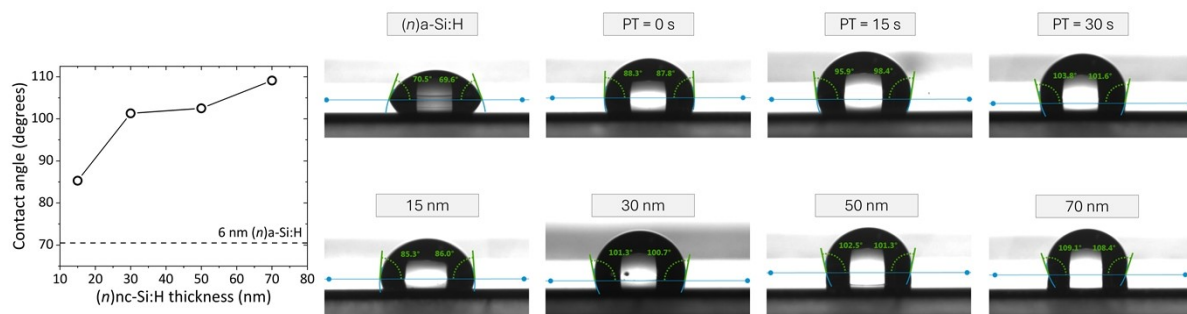

**Figure S19.** Contact angles after HTL-SAM deposition on textured c-Si wafers featuring various (n)-layers with 10-nm-thick ITO. The dashed line in the plot represents the contact angle of the sample with 6-nm-thick (n)a-Si:H and 10-nm-thick ITO layers.

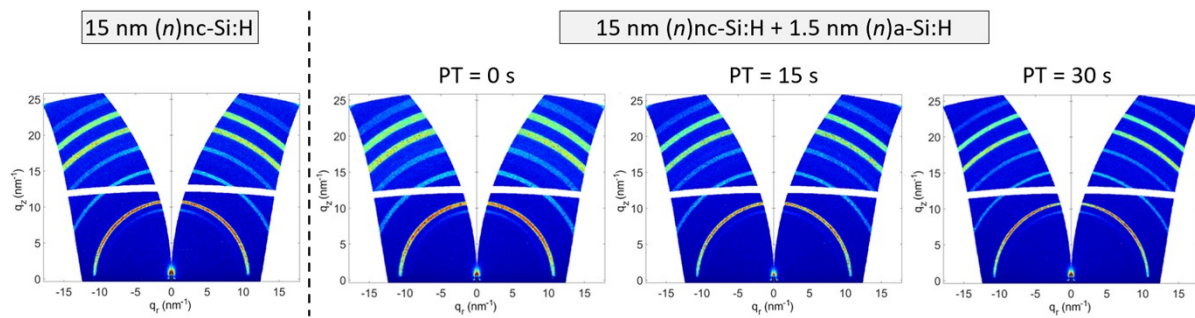

**Figure S20.** Transformed GIWAXS images of perovskites deposited on samples with various (*n*)-layers.

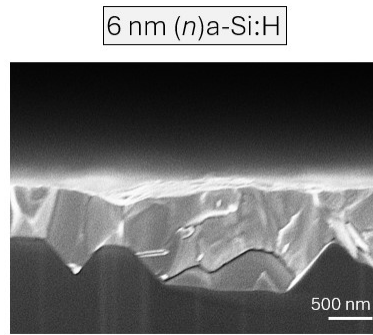

**Figure S21.** The cross-sectional SEM micrograph of the sample featuring a 6-nm-thick (*n*)a-Si:H layer.

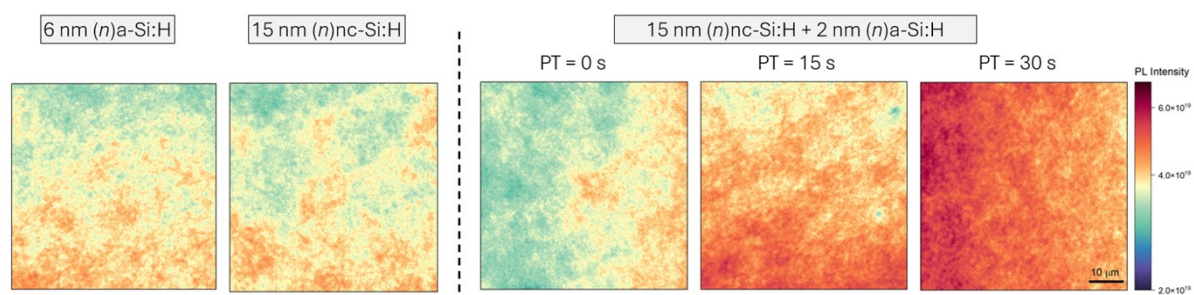

**Figure S22.** Absolute PL intensity images of perovskites deposited on samples with various  $(n)$ -layers.



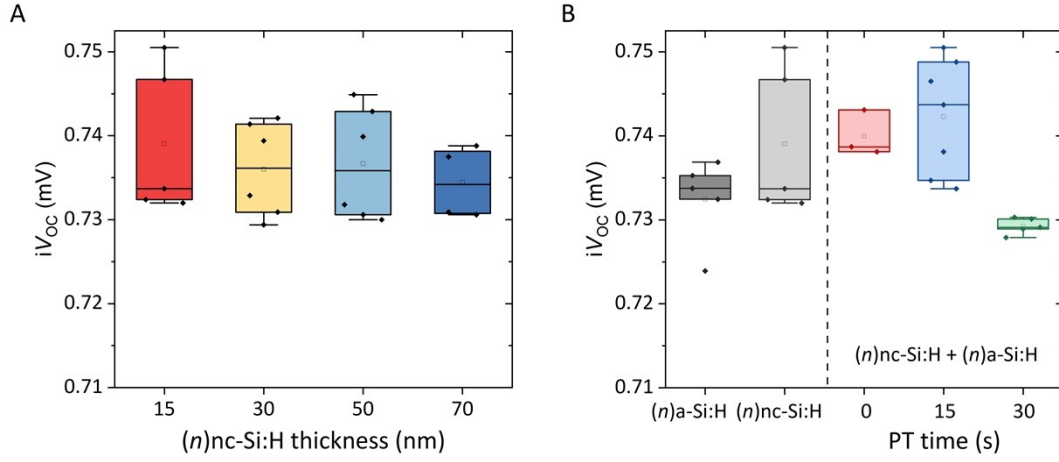

**Figure S23.** The implied  $V_{OC}$  ( $iV_{OC}$ ) of SHJ bottom-cell precursors corresponding to the structure of  $(n)$ -layer (stack)/ $(i)$ a-Si:H/ $(n)$ c-Si/ $(i)$ a-Si:H/ $(p)$ -layer stack, where  $(n)$ -layer (stack) refers to **A** varied thicknesses of  $(n)$ nc-Si:H layers without plasma treatment, and **B** various  $(n)$ -layers (stacks), namely, 6-nm-thick  $(n)$ a-Si:H layer, 15-nm-thick  $(n)$ nc-Si:H layer without plasma treatment (labeled as  $(n)$ nc-Si:H), and 15-nm-thick  $(n)$ nc-Si:H + 2-nm-thick  $(n)$ a-Si:H layer stack with varied durations of plasma treatment.

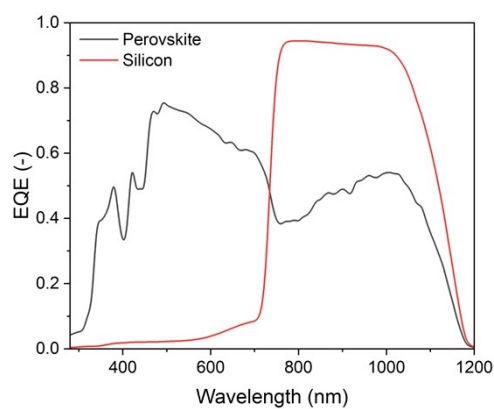

**Figure S24.** The EQE response of the perovskite-silicon tandem cell based on the silicon bottom cell with a 6-nm-thick (*n*)a-Si:H layer. Note that the long-wavelength response of perovskite top cell can occur when the limiting sub-cell is shunted.

## References

1. Li, Q. *et al.* Defects evolution and their impacts on conductivity of indium tin oxide thin films upon thermal treatment. *J Appl Phys* 118, (2015).
2. Aydin, E. *et al.* Enhanced optoelectronic coupling for perovskite/silicon tandem solar cells. *Nature* 623, 732–738 (2023).
3. Usui, S. & Kikuchi, M. Properties of heavily doped GD $\square$  Si with low resistivity. *J Non Cryst Solids* 34, 1–11 (1979).
4. Lubberts, G., Burkey, B. C., Moser, F. & Trabka, E. A. Optical properties of phosphorus-doped polycrystalline silicon layers. *J Appl Phys* 52, 6870–6878 (1981).
5. Köhler, M. *et al.* A silicon carbide-based highly transparent passivating contact for crystalline silicon solar cells approaching efficiencies of 24%. *Nat Energy* 6, 529–537 (2021).
6. Larbi, F. *et al.* Density of states in intrinsic and n/p-doped hydrogenated amorphous and microcrystalline silicon. *Journal of Modern Physics* 2, 1030–1036 (2011).
7. Jackson, W. B. & Amer, N. M. Direct measurement of gap-state absorption in hydrogenated amorphous silicon by photothermal deflection spectroscopy. *Phys Rev B* 25, 5559 (1982).
8. Zhao, Y. *et al.* Design and optimization of hole collectors based on nc-SiO $_x$ : H for high-efficiency silicon heterojunction solar cells. *Solar Energy Materials and Solar Cells* 219, 110779 (2021).
9. Zhao, Y. *et al.* Ultra-thin electron collectors based on nc-Si: H for high-efficiency silicon heterojunction solar cells. *Progress in Photovoltaics: research and applications* 30, 809–822 (2022).
